# Supplementary material for: Optimal sample size planning for the Wilcoxon‐Mann‐Whitney test
Source: PubMed Central journal article supplement (PMC6491996; doi:10.1002/sim.7983), 2018-10-08
Supplement: SIM-38-363-s004.pdf [file SIM-38-363-s004.pdf]

# Supplementary Material for: Optimal Sample Size Planning for the Wilcoxon-Mann-Whitney-Test

By Martin Happ, Arne C. Bathke and Edgar Brunner

July 17, 2018

## 1 Derivation of the Results

### 1.1 Interval for the Optimal Design

**Result 1.** *If we assume  $\sigma_1 = \sigma_2$  and  $1 - \beta > 0.5$  then the optimal design is given by  $t_0 = \frac{1}{2}$ . It is not necessary to assume  $1 - \beta > 0.5$  but it is convenient to do so in order to avoid a situation where  $N(t) = 0$  for all  $t \in (0, 1)$ .*

*Proof.* The numerator of  $N(t)$  does not depend on  $t$  in this case, therefore  $N(t)$  is minimized by  $t_0 = \frac{1}{2}$ .  $\square$

**Result 2.** *For  $1 - \beta > 0.5$  and  $0 < \sigma_1 < \sigma_2$  the sample size is minimized by  $t_0 \in [I_1, I_2]$  with  $I_1 \leq I_2 < \frac{1}{2}$ . The minimizer is unique in the interval  $(0, 1)$ . The bounds  $I_1$  and  $I_2$  are given by*

$$I_1 = \frac{1}{\kappa + 1}, \quad (1)$$

$$I_2 = \frac{\sqrt{z}}{\sqrt{z} + (u_{1-\alpha/2}\sqrt{q}\sigma + u_{1-\beta}\sigma_2^2)}, \quad (2)$$

with  $\kappa = \sigma_2/\sigma_1$ ,  $q = p(1-p)$  and  $z = (u_{1-\alpha/2}\sqrt{q}\sigma + u_{1-\beta}\sigma_1^2)(u_{1-\alpha/2}\sqrt{q}\sigma + u_{1-\beta}\sigma_2^2)$ . Additionally the following equivalence holds

$$t_0 < \frac{1}{2} \iff \sigma_1 < \sigma_2. \quad (3)$$

*Proof.* First we calculate the derivative of  $N$  which is given by

$$\frac{d}{dt}N(t) = (u_{1-\alpha/2}\sigma + u_\beta\sqrt{\sigma_1^2(1-t) + \sigma_2^2t})\frac{g(t)}{f(t)}, \quad (4)$$

where the functions  $f$  and  $g$  are defined by

$$\begin{aligned} g(t) &= u_{1-\alpha/2} \sigma(2t-1) \sqrt{\sigma_1^2(1-t) + \sigma_2^2 t} - u_\beta (\sigma_1^2(1-t)^2 - \sigma_2^2 t^2), \\ f(t) &= (p - \frac{1}{2})^2 (1-t)^2 t^2 \sqrt{\sigma_1^2(1-t) + \sigma_2^2 t^2}. \end{aligned}$$

Only  $g(t)$  has a root in  $(0, 1)$ . Therefore, we only need to consider this function for finding the optimal  $t_0$ . To prove the equivalence we start with  $t_0 < \frac{1}{2}$ . In this case,  $t_0 > \lambda = \frac{1}{\kappa+1}$ . Because  $\frac{1}{2} > t_0 > \lambda$  it follows that  $\kappa > 1$ . The other direction can be proved in a similar manner.

Now that we know  $t_0 < \frac{1}{2}$  we can easily construct an interval for  $t_0$ . A lower bound is given by  $\lambda$ . For the upper bound we use the monotonic function

$$h(t) = u_{1-\alpha/2} \sigma(2t-1) \sqrt{q} - u_\beta (\sigma_1^2(1-t)^2 - \sigma_2^2 t^2). \quad (5)$$

This function satisfies  $h(t) < g(t)$  for all  $t \in (0, \frac{1}{2})$  and it has exactly one root  $I_2$  in  $(0, \frac{1}{2})$ . From this it immediately follows that  $t_0 < I_2$ .

For the uniqueness in  $(0, 1)$ , consider a second solution  $t'_0 \leq t_0$ . It follows immediately that  $t'_0 > \lambda$  and consequently  $\lambda \leq t'_0 \leq t_0 \leq \frac{1}{2}$ . But  $g$  is strictly monotone in  $(0, \frac{1}{2})$ , therefore both roots are equal.  $\square$

**Result 3.** For  $1 - \beta > 0.5$  and  $\sigma_1 > \sigma_2 > 0$  the sample size is minimized by  $t_0 \in [I_2, I_1]$  with  $I_1 \geq I_2 > \frac{1}{2}$ . The minimizer is unique in the interval  $(0, 1)$ . The bounds are the same as in the previous theorem. Additionally the following equivalence holds

$$t_0 > \frac{1}{2} \iff \sigma_1 > \sigma_2. \quad (6)$$

*Proof.* Similar proof as in the case  $0 < \sigma_1 < \sigma_2$ .  $\square$

**Result 4.** For the case  $\sigma_1 = 0 < \sigma_2$ , we cannot apply the result from before. But using a similar idea we can find a lower bound  $l(t)$  for the function  $g(t)$  which is defined by

$$l(t) = u_{1-\alpha/2} \sigma(2t-1) \sigma_2 t + u_\beta \sigma_2^2 t^2 \quad (7)$$

and this function only has one root in  $(0, 1)$ , namely

$$I_1^{(0)} = \frac{u_{1-\alpha/2} \sigma}{2u_{1-\alpha/2} \sigma + u_{1-\beta} \sigma_2} = \frac{1}{2 + \gamma}, \quad (8)$$

where  $\gamma = u_{1-\beta} \sigma_2 / (u_{1-\alpha/2} \sigma)$ . Then an interval for the optimal design is given by  $[I_1^{(0)}, I_2]$ .

## 1.2 Optimality of a Balanced Design

From the construction of an interval for  $t_0$  it is clear that  $t_0 = 1/2$  if and only if  $\sigma_1^2 = \sigma_2^2$ . The equality of variances simply means

$$\int F_2^2 dF_1 - \left( \int F_2 dF_1 \right)^2 = \int F_1^2 dF_2 - \left( \int F_1 dF_2 \right)^2. \quad (9)$$

From that we can easily conclude the equivalence

$$t_0 = \frac{1}{2} \iff \int F_1^2 dF_2 = \int (1 - F_2)^2 dF_1. \quad (10)$$

**Result 5.** *Let us now consider normalized cumulative distribution functions  $F_1, F_2$  for which an  $a \in \mathbb{R}$  exists such that for all  $x \in \mathbb{R}$*

$$F_1(a + x) = 1 - F_2(a - x). \quad (11)$$

*holds, that is,*

$$F_1(a + x) = 1 - F_2(a - x). \quad (12)$$

*Then the optimal design is given by  $t_0 = 1/2$ . Furthermore if such an  $a$  exists and the expectations of the two distributions are finite, then the constant  $a$  can be explicitly calculated as*

$$a = \frac{1}{2} \left( \int x dF_1(x) + \int x dF_2(x) \right), \quad (13)$$

*that is,  $a$  is the average of the expected values. If the third moments are finite, then it follows from (11) that the variances of the distributions  $F_1$  and  $F_2$  are equal and their skewness have opposite sign. In the case  $F_1 = F_2$ , the assumption (11) simply means that  $F_1$  is a symmetric distribution.*

*Proof.* This equivalence holds since  $F_1$  and  $F_2$  satisfy  $\int F_1^2 dF_2 = \int (1 - F_2)^2 dF_1$ . Equation (13) follows directly after some calculations by first considering  $F_1$  and  $F_2$  to be either continuous or discrete. Then (13) also holds for distributions with a continuous and discrete proportion. First we proof (13) for the discrete case. Note that from (11) we can conclude that  $P(X_1 = x) = P(X_2 = 2a - x)$  holds. Then for discrete  $X_1 \sim F_1$  and  $X_2 \sim F_2$  the result follows from

$$\begin{aligned} EX_1 &= \sum_i x_i P(X_1 = x_i) \\ &= - \sum_i (2a - x_i) P(X_2 = 2a - x_i) + 2a = -EX_2 + 2a. \end{aligned}$$

The derivation for the continuous case is similar. □

## 2 Simulation Results

For the simulation results from Section 5 from the main manuscript, we provide here the detailed results in tables. For the first simulation we used  $Beta(5, 5)$  and  $Beta(3, i)$  distributed random numbers in the first and second group for  $i = 1, 2$ . For each  $\alpha = 0.01, 0.02, \dots, 0.1$ , we generated  $10^6$  random numbers for each group and calculated the optimal allocation rate  $t_0$  and the total sample sizes  $N(t_0)$  and  $N(1/2)$  (corresponding to a balanced design) to achieve at least 80% power. The results for this simulation are given in Table 1.

| $t_0$ | $N(t_0)$       | $N(1/2)$       | $p$   | $\kappa$ | $\alpha$ | Effect |
|-------|----------------|----------------|-------|----------|----------|--------|
| 0.482 | 50344960.322   | 50409713.296   | 0.500 | 1.346    | 0.010    | small  |
| 0.481 | 222750477.448  | 223086550.485  | 0.500 | 1.348    | 0.020    | small  |
| 0.479 | 443308371.783  | 444071245.977  | 0.500 | 1.354    | 0.030    | small  |
| 0.479 | 67091178.939   | 67213282.976   | 0.500 | 1.349    | 0.040    | small  |
| 0.478 | 11583242.470   | 11606226.291   | 0.500 | 1.354    | 0.050    | small  |
| 0.477 | 498345769.404  | 499384278.237  | 0.500 | 1.352    | 0.060    | small  |
| 0.476 | 16344782.706   | 16380754.863   | 0.500 | 1.353    | 0.070    | small  |
| 0.476 | 8086796.166    | 8105460.208    | 0.501 | 1.353    | 0.080    | small  |
| 0.475 | 1089424989.407 | 1092041624.592 | 0.500 | 1.352    | 0.090    | small  |
| 0.475 | 3308023.922    | 3316170.091    | 0.499 | 1.349    | 0.100    | small  |
| 0.476 | 153.568        | 153.920        | 0.657 | 1.532    | 0.010    | medium |
| 0.474 | 131.511        | 131.862        | 0.657 | 1.531    | 0.020    | medium |
| 0.473 | 117.487        | 117.835        | 0.658 | 1.532    | 0.030    | medium |
| 0.472 | 108.820        | 109.170        | 0.658 | 1.532    | 0.040    | medium |
| 0.471 | 102.184        | 102.534        | 0.657 | 1.530    | 0.050    | medium |
| 0.470 | 96.490         | 96.843         | 0.657 | 1.533    | 0.060    | medium |
| 0.469 | 91.355         | 91.707         | 0.657 | 1.532    | 0.070    | medium |
| 0.468 | 87.552         | 87.906         | 0.657 | 1.532    | 0.080    | medium |
| 0.467 | 84.237         | 84.592         | 0.657 | 1.531    | 0.090    | medium |
| 0.467 | 80.319         | 80.674         | 0.657 | 1.534    | 0.100    | medium |
| 0.472 | 28.609         | 28.698         | 0.841 | 1.975    | 0.010    | large  |
| 0.470 | 24.329         | 24.418         | 0.841 | 1.974    | 0.020    | large  |
| 0.468 | 21.739         | 21.827         | 0.841 | 1.970    | 0.030    | large  |
| 0.466 | 19.922         | 20.010         | 0.841 | 1.972    | 0.040    | large  |
| 0.465 | 18.522         | 18.611         | 0.841 | 1.973    | 0.050    | large  |
| 0.464 | 17.376         | 17.464         | 0.841 | 1.973    | 0.060    | large  |
| 0.463 | 16.445         | 16.535         | 0.841 | 1.980    | 0.070    | large  |
| 0.462 | 15.625         | 15.714         | 0.841 | 1.974    | 0.080    | large  |
| 0.461 | 14.900         | 14.989         | 0.841 | 1.975    | 0.090    | large  |
| 0.460 | 14.204         | 14.292         | 0.841 | 1.973    | 0.100    | large  |

Table 1: Simulation results for varying type-I error probability  $\alpha$ .

For the second simulation we investigated the behaviour of  $t_0$  for increasing power (or decreasing  $\beta$ ). The results are displayed in Table 2.

In both simulations we observed that an increasing power or type-I error rate leads to larger differences of  $|1/2 - t_0|$ , that is the groups will be even more unbalanced. Similarly, from the simulations we also saw that a larger relative effect  $p$  and  $\kappa$  increase  $|1/2 - t_0|$ . But the difference of total sample sizes between using a balanced design and the optimal design was negligible. For larger and medium effects this difference was at most 1, that is  $|N(t_0) - N(1/2)| \leq 1$ . For small effect  $p \sim 0.5$  these differences are larger but they are still negligible as the total sample size itself is very large. Note that increasing  $p$  also changes  $\kappa$ , in our case  $\kappa$  increases with  $p$ .

| $t_0$ | $N(t_0)$       | $N(1/2)$       | $p$   | $\kappa$ | $1 - \beta$ | Effect |
|-------|----------------|----------------|-------|----------|-------------|--------|
| 0.500 | 16527695.653   | 16527695.653   | 0.500 | 1.346    | 0.500       | small  |
| 0.496 | 96422766.696   | 96430226.036   | 0.500 | 1.348    | 0.550       | small  |
| 0.492 | 239229025.677  | 239297902.533  | 0.500 | 1.354    | 0.600       | small  |
| 0.488 | 44000655.214   | 44026179.733   | 0.500 | 1.349    | 0.650       | small  |
| 0.484 | 9106746.129    | 9115651.669    | 0.500 | 1.354    | 0.700       | small  |
| 0.481 | 466636900.324  | 467303128.247  | 0.500 | 1.352    | 0.750       | small  |
| 0.478 | 18219581.045   | 18255539.953   | 0.500 | 1.353    | 0.800       | small  |
| 0.474 | 10804151.660   | 10832469.375   | 0.501 | 1.353    | 0.850       | small  |
| 0.471 | 1778183697.600 | 1784259299.398 | 0.500 | 1.352    | 0.900       | small  |
| 0.466 | 6949665.830    | 6980860.750    | 0.499 | 1.349    | 0.950       | small  |
| 0.500 | 51.920         | 51.920         | 0.657 | 1.532    | 0.500       | medium |
| 0.494 | 58.363         | 58.371         | 0.657 | 1.531    | 0.550       | medium |
| 0.489 | 64.711         | 64.742         | 0.658 | 1.532    | 0.600       | medium |
| 0.484 | 72.500         | 72.573         | 0.658 | 1.532    | 0.650       | medium |
| 0.480 | 81.243         | 81.378         | 0.657 | 1.530    | 0.700       | medium |
| 0.475 | 90.959         | 91.185         | 0.657 | 1.533    | 0.750       | medium |
| 0.471 | 102.053        | 102.404        | 0.657 | 1.532    | 0.800       | medium |
| 0.466 | 116.654        | 117.190        | 0.657 | 1.532    | 0.850       | medium |
| 0.461 | 136.368        | 137.194        | 0.657 | 1.531    | 0.900       | medium |
| 0.454 | 166.142        | 167.507        | 0.657 | 1.534    | 0.950       | medium |
| 0.500 | 11.010         | 11.010         | 0.841 | 1.975    | 0.500       | large  |
| 0.494 | 12.045         | 12.047         | 0.841 | 1.974    | 0.550       | large  |
| 0.488 | 13.092         | 13.099         | 0.841 | 1.970    | 0.600       | large  |
| 0.482 | 14.227         | 14.246         | 0.841 | 1.972    | 0.650       | large  |
| 0.476 | 15.478         | 15.512         | 0.841 | 1.973    | 0.700       | large  |
| 0.471 | 16.879         | 16.936         | 0.841 | 1.973    | 0.750       | large  |
| 0.465 | 18.547         | 18.637         | 0.841 | 1.980    | 0.800       | large  |
| 0.459 | 20.564         | 20.700         | 0.841 | 1.974    | 0.850       | large  |
| 0.452 | 23.235         | 23.444         | 0.841 | 1.975    | 0.900       | large  |
| 0.443 | 27.374         | 27.716         | 0.841 | 1.973    | 0.950       | large  |

Table 2: Simulation results for varying power  $1 - \beta$ .

## 3 R Code

### 3.1 Power Simulation

```
x1 # vector of synthetic data of first group
x2 # vector of synthetic data of second group

R <- 10^4
reject <- 0
n1 <- 299
n2 <- 299
set.seed(0)
for(i in 1:R){
z1 <- sample(x1, size = n1, prob = NULL, replace = TRUE)
z2 <- sample(x2, size = n2, prob = NULL, replace = TRUE)

df = data.frame(grp = c(rep(1,n1), rep(2,n2)), z = c(z1,z2))
df$grp <- as.factor(df$grp)

p <- rank.two.samples(z~grp, data = df, wilcoxon = "asymptotic",
info = FALSE, shift.int=FALSE,
alternative = "two.sided")$Wilcoxon$p.Value
if(p <= 0.05){
reject <- reject + 1
}
}
```

### 3.2 Minimize $t$

```
x1 # vector of synthetic data of first group
x2 # vector of synthetic data of second group
alpha = 0.05
beta=0.8
m1 <- length(x1)
m2 <- length(x2)

# ranks among union of samples:
R <- rank(c(x1,x2), ties.method="average")
R1 <- R[1:m1]
R2 <- R[m1+(1:m2)]

# ranks within samples:
R11 <- rank(x1, ties.method="average")
R22 <- rank(x2, ties.method="average")
```

```

# placements:
P1 <- R1 - R11
P2 <- R2 - R22

# effect size:
pStar <- (mean(R2)-mean(R1)) / (m1+m2) + 0.5

# variances:
sigmaStar <- sqrt(sum((R11-((m1+1)/2))^2) / m1^3)
sigma1Star <- sqrt(sum((P1-mean(P1))^2) / (m1*m2^2))
sigma2Star <- sqrt(sum((P2-mean(P2))^2) / (m1^2*m2))

sigmaStar <- sqrt(sum( (R- (m1+m2+1)/2)^2 )/(m1+m2)^3)

ss = function(t){
return((sigmaStar*qnorm(1-alpha/2) + qnorm(beta)*sqrt(t*sigma2Star^2 +
(1-t)*sigma1Star^2))^2 / (t*(1-t)*(pStar-0.5)^2))
}

# sample size with balanced groups
ss(1/2)

# optimal t
optimize(ss,interval=c(0,1), maximum=FALSE,tol = .Machine$double.eps)$minimum

# sample size given optimal t
optimize(ss,interval=c(0,1), maximum=FALSE,tol = .Machine$double.eps)$objective

```
